# Supplementary material for: Investigation the global effect of rare earth gadolinium on the budding Saccharomyces cerevisiae by genome-scale screening
Source: Frontiers journal article supplement (doi:10.3389/fmicb.2022.1022054), 2022-11-28
Supplement: Image_1.pdf [file Image_1.pdf]

**Supplementary Figure 1**

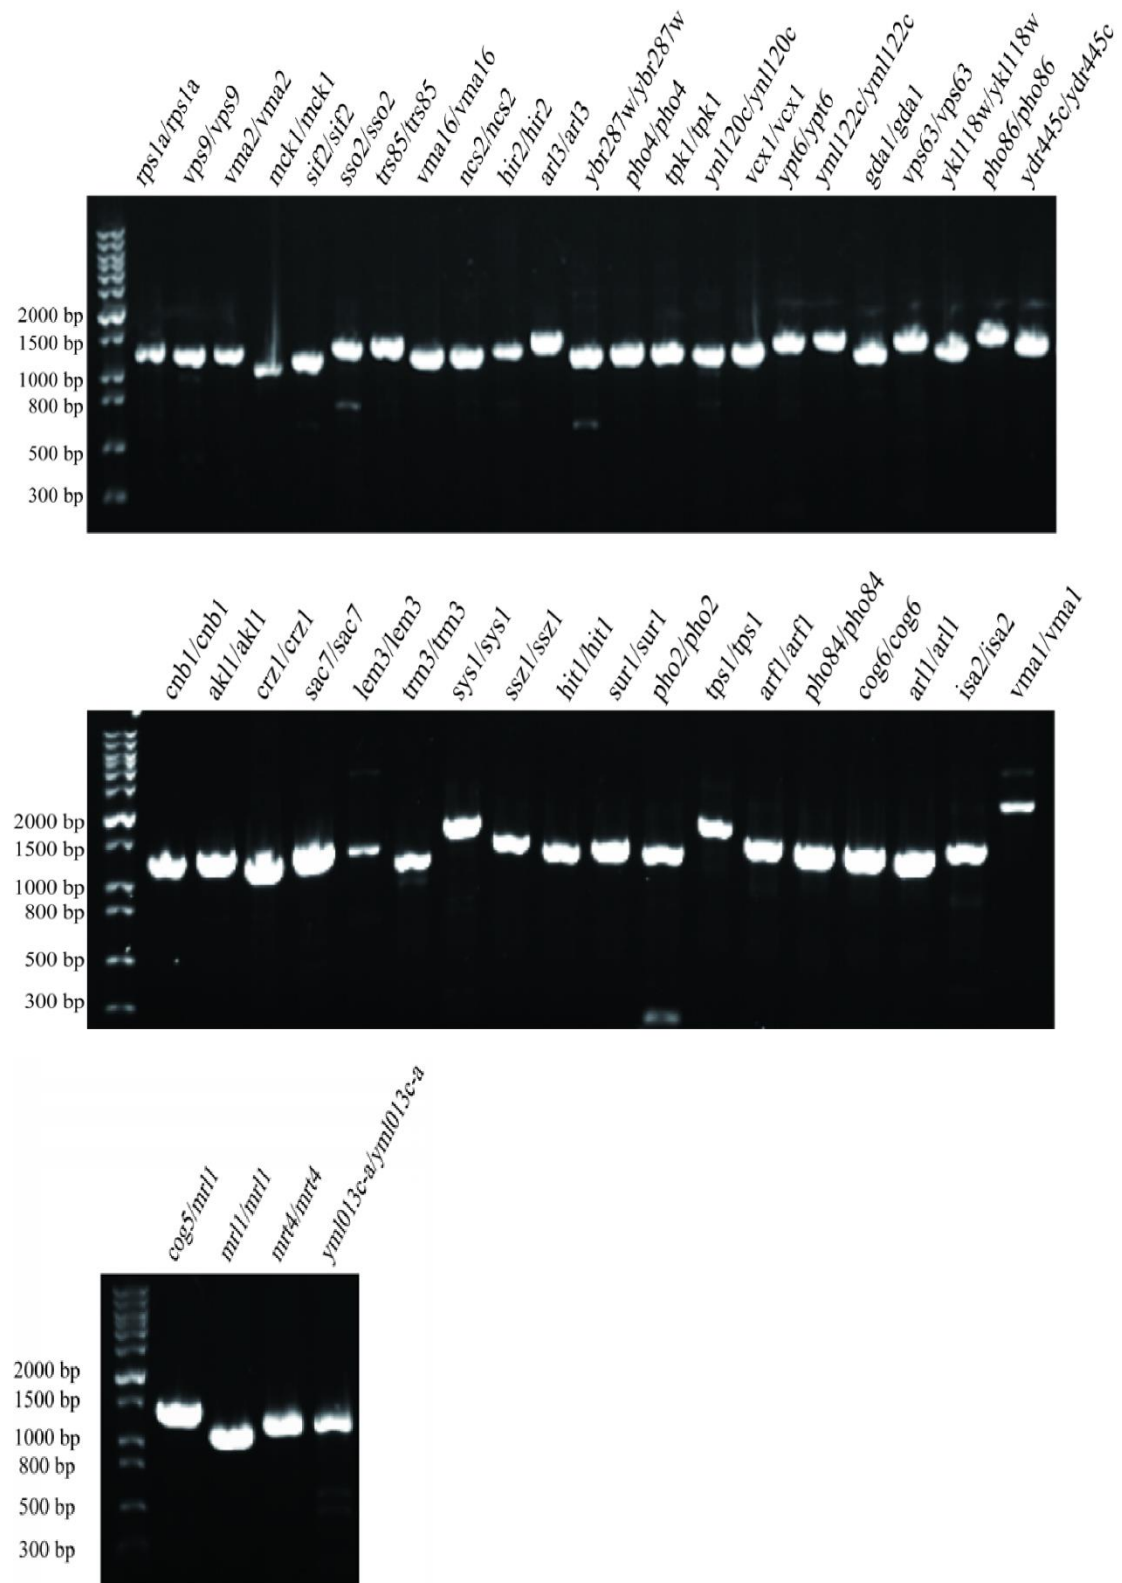

**Supplementary Fig 1.** Gd-sensitive deletion strain genotype testing by PCR.
