# Supplementary material for: Investigation the global effect of rare earth gadolinium on the budding Saccharomyces cerevisiae by genome-scale screening
Source: Frontiers journal article supplement (doi:10.3389/fmicb.2022.1022054), 2022-11-28
Supplement: Image_2.pdf [file Image_2.pdf]

## Supplementary Figure 2

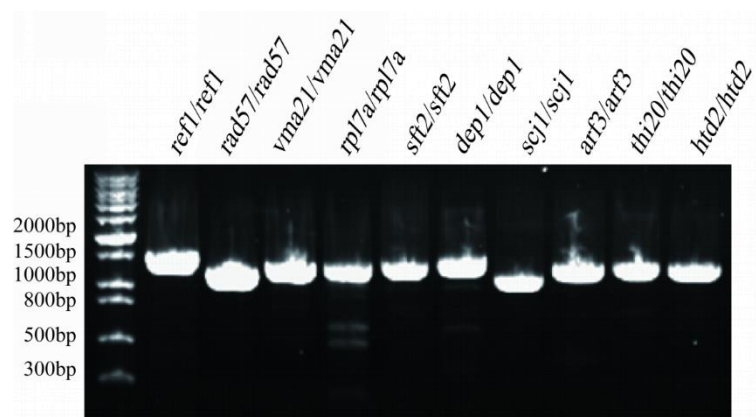

**Supplementary Fig 2.** Gd-resistance deletion strain genotype testing by PCR.
