# Supplementary material for: Investigation the global effect of rare earth gadolinium on the budding Saccharomyces cerevisiae by genome-scale screening
Source: Front Microbiol. 2022 Nov 28;13:1022054. doi: 10.3389/fmicb.2022.1022054 (PMC9742279; doi:10.3389/fmicb.2022.1022054)
Supplement: Supplementary file 6 [file Table_3.XLS]

## Sheet: Sheet1
Fig 6. Intracellular Gd concentration in 45 Gd-sensitive gene deletion mutants under Gd stress.
			Gd1	Gd2	Gd3	Gd4	Gd5	Gd6	mean	SEM	P		mean	SEM
BY4743	BY4743	BY4743	0.869612	0.999274	0.865018	1.14582	0.985642	1.13463	1	0.122326		BY4743	1	0.122326
SUR1	sur1/sur1	YPL057C	2.4709	2.49445	2.50387	3.9486	3.80575	3.98499	3.20143	0.781986	4.66605e-05	sur1/sur1	3.20143	0.781986
TPS1	tps1/tps1	YBR126C	1.71662	1.74458	1.74561	1.48001	1.45697	1.49467	1.60641	0.142412	1.29685e-05	tps1/tps1	1.60641	0.142412
SIF2	sif2/sif2	YBR103W	1.21912	1.24753	1.25195	1.29947	1.29162	1.29423	1.26732	0.0325537	0.000417358	sif2/sif2	1.26732	0.0325537
MCK1	mck1/mck1	YNL307C	1.18771	1.21174	1.21441	2.28884	2.24379	2.30609	1.7421	0.589199	0.0128797	mck1/mck1	1.7421	0.589199
SAC7	sac7/sac7	YDR389W	1.01303	1.10603	1.10679	1.54954	1.50486	1.55537	1.30594	0.255558	0.0245237	sac7/sac7	1.30594	0.255558
HIR2	hir2/hir2	YOR038C	1.23451	1.26455	1.26774	1.36437	1.34733	1.35841	1.30615	0.0568393	0.000240849	hir2/hir2	1.30615	0.0568393
PHO4	pho4/pho4	YFR034C	1.2724	1.38313	1.38313	1.20411	1.19207	1.21234	1.27453	0.0885652	0.00122982	pho4/pho4	1.27453	0.0885652
PHO2	pho2/pho2	YDL106C	1.78008	1.81359	1.8207	1.75434	1.72813	1.76956	1.77773	0.0352444	3.57605e-08	pho2/pho2	1.77773	0.0352444
CRZ1	crz1/crz1	YNL027W	1.09062	1.10745	1.11181	1.95886	1.91156	1.97282	1.52552	0.463026	0.022782	crz1/crz1	1.52552	0.463026
RPS1A	rps1a/rps1a	YLR441C	2.30406	2.38914	2.39027	5.98642	5.79775	6.04365	4.15188	1.96358	0.00284668	rps1a/rps1a	4.15188	1.96358
GDA1	gda1/gda1	YEL042W	1.1406	1.25572	1.25572	1.44408	1.41078	1.44985	1.32613	0.12706	0.00109265	gda1/gda1	1.32613	0.12706
MRT4	mrt4/mrt4	YKL009W	1.09534	1.19144	1.19058	1.92958	1.87074	1.93788	1.53593	0.414893	0.0125717	mrt4/mrt4	1.53593	0.414893
NCS2	ncs2/ncs2	YNL119W	1.2304	1.24074	1.24739	2.43101	2.31939	2.41521	1.81402	0.63053	0.0111658	ncs2/ncs2	1.81402	0.63053
CNB1	cnb1/cnb1	YKL190W	1.01396	1.12099	1.12286	1.85555	1.80498	1.86224	1.46343	0.41587	0.0256557	cnb1/cnb1	1.46343	0.41587
SSZ1	ssz1/ssz1	YHR064C	2.23107	2.27602	2.28667	2.75381	2.72875	2.7774	2.50895	0.268779	1.96379e-07	ssz1/ssz1	2.50895	0.268779
TRM9	trm9/trm9	YML014W	1.35731	1.38396	1.38776	1.68663	1.65722	1.69986	1.52879	0.167894	9.6887e-05	trm9/trm9	1.52879	0.167894
HIT1	hit1/hit1	YJR055W	2.8276	2.91574	2.92585	3.72562	3.58721	3.75538	3.28957	0.442984	2.49373e-07	hit1/hit1	3.28957	0.442984
YKL118W	ykl118w/ykl118w	YKL118W	2.06122	2.33625	2.33724	2.64736	2.53966	2.66024	2.43033	0.230509	1.00961e-07	ykl118w/ykl118w	2.43033	0.230509
VPS63	vps63/vps63	YLR261C	2.02972	2.24128	2.23872	2.88156	2.77876	2.90006	2.51168	0.384421	3.46605e-06	vps63/vps63	2.51168	0.384421
YML122C	yml122c/yml122c	YML122C	1.65098	1.85075	1.85251	1.81511	1.76506	1.8278	1.7937	0.0768427	9.86737e-08	yml122c/yml122c	1.7937	0.0768427
YDR445C	ydr445c/ydr445c	YDR445C	1.42561	1.45335	1.45839	1.03343	1.03092	1.04223	1.24066	0.225014	0.0441305	ydr445c/ydr445c	1.24066	0.225014
YNL120C	ynl120c/ynl120c	YNL120C	1.16518	1.17572	1.17993	1.41145	1.39113	1.40552	1.28815	0.125742	0.00242475	ynl120c/ynl120c	1.28815	0.125742
YBR287W	ybr287w/ybr287w	YBR287W	1.19141	1.22558	1.22368	1.15054	1.12958	1.14726	1.17801	0.0414065	0.00704624	ybr287w/ybr287w	1.17801	0.0414065
			Gd1	Gd2	Gd3	Gd4	Gd5	Gd6	mean	SEM	P		mean	SEM
BY4743	BY4743	BY4743	0.869612	0.999274	0.865018	1.14582	0.985642	1.13463	1	0.122326		BY4743	1	0.122326
PHO84	pho84/pho84	YML123C	1.60804	1.7864	1.7864	1.51357	1.47956	1.52338	1.61622	0.138432	9.78102e-06	pho84/pho84	1.61622	0.138432
PHO86	pho86/pho86	YJL117W	1.42031	1.57302	1.57302	1.76569	1.70428	1.78135	1.63628	0.13933	7.61174e-06	pho86/pho86	1.63628	0.13933
VCX1	vcx1/vcx1	YDL128W	1.01304	1.02434	1.0291	1.8656	1.8279	1.87791	1.43965	0.457661	0.0463124	vcx1/vcx1	1.43965	0.457661
GDT1	gdt1/gdt1	YBR187W	1.05606	1.07115	1.07492	2.0012	1.95727	2.01584	1.52941	0.506533	0.0320688	gdt1/gdt1	1.52941	0.506533
TRK1	trk1/trk1	YJL129C	1.26546	1.30073	1.30339	1.20926	1.19415	1.20548	1.24641	0.049692	0.00102406	trk1/trk1	1.24641	0.049692
LEM3	lem3/lem3	YNL323W	0.927723	1.00986	1.01206	1.50468	1.4685	1.50669	1.23825	0.281357	0.0863066	lem3/lem3	1.23825	0.281357
SSO2	sso2/sso2	YMR183C	1.13074	1.23127	1.2347	1.60814	1.58433	1.61324	1.4004	0.224083	0.00325584	sso2/sso2	1.4004	0.224083
ARF1	arf1/arf1	YDL192W	1.12521	1.14596	1.14721	1.70203	1.62484	1.68929	1.40576	0.292991	0.0106837	arf1/arf1	1.40576	0.292991
ARL1	arl1/arl1	YBR164C	1.19558	1.32474	1.32185	1.68795	1.63917	1.69822	1.47792	0.221895	0.000950298	arl1/arl1	1.47792	0.221895
ARL3	arl3/arl3	YPL051W	1.09973	1.20189	1.19948	2.13143	2.07199	2.14417	1.64145	0.521569	0.0149664	arl3/arl3	1.64145	0.521569
SYS1	sys1/sys1	YJL004C	1.09661	1.10474	1.11152	1.99736	1.94328	2.01218	1.54428	0.482557	0.0231683	sys1/sys1	1.54428	0.482557
LOA1	loa1/loa1	YPR139C	1.20459	1.30855	1.30855	2.10001	2.04084	2.11084	1.6789	0.445914	0.0048767	loa1/loa1	1.6789	0.445914
VMA1	vma1/vma1	YDL185W	1.71823	1.93668	1.93333	2.81993	2.74234	2.83767	2.33136	0.520401	0.000115638	vma1/vma1	2.33136	0.520401
VMA2	vma2/vma2	YBR127C	1.61756	1.59849	1.56892	3.37296	3.24719	3.40269	2.46797	0.957848	0.00395066	vma2/vma2	2.46797	0.957848
COG5	cog5/cog5	YNL051W	1.17658	1.30671	1.30603	1.37422	1.33212	1.38487	1.31342	0.0748016	0.000321608	cog5/cog5	1.31342	0.0748016
COG6	cog6/cog6	YNL041C	1.20383	1.33323	1.33323	1.79272	1.75375	1.80921	1.53766	0.275866	0.00141177	cog6/cog6	1.53766	0.275866
VPS9	vps9/vps9	YML097C	1.28641	1.30357	1.30513	3.59253	3.46524	3.61724	2.42835	1.23893	0.0184642	vps9/vps9	2.42835	1.23893
MRL1	mrl1/mrl1	YPR079W	1.16034	1.17836	1.18237	1.53067	1.46841	1.51625	1.3394	0.182844	0.00360756	mrl1/mrl1	1.3394	0.182844
AKL1	akl1/akl1	YBR059C	1.14416	1.17375	1.17556	1.88413	1.8181	1.86977	1.51091	0.380285	0.0106399	akl1/akl1	1.51091	0.380285
YPT6	ypt6/ypt6	YLR262C	1.08291	1.18136	1.183	2.45831	2.34905	2.47196	1.78777	0.701866	0.0219921	ypt6/ypt6	1.78777	0.701866
TRS85	trs85/trs85	YDR108W	1.14102	1.24157	1.24516	2.07014	2.00185	2.07474	1.62908	0.462138	0.00912355	trs85/trs85	1.62908	0.462138
ISA2	isa2/isa2	YPR067W	1.04784	1.03738	1.01523	1.40034	1.36868	1.41069	1.21336	0.197809	0.0484179	isa2/isa2	1.21336	0.197809
